# Supplementary material
Source: PubMed Central journal article supplement (PMC130547)
Supplement: pnas_192442699_2.pdf [file pnas_192442699_2.pdf]

**Table 2. Rate equations and parameter values of the gene network model**

| Rate equation                                                                                                                                                                                                                                                    | Parameter values                                                                          |
|------------------------------------------------------------------------------------------------------------------------------------------------------------------------------------------------------------------------------------------------------------------|-------------------------------------------------------------------------------------------|
| $V_1^{\text{synth}} = \frac{V_1^s \cdot \left(1 + A_{14} \cdot \left(\frac{[mRNA_4]}{K_{14}^a}\right)^{n_{14}}\right)}{\left(1 + \left(\frac{[mRNA_4]}{K_{14}^a}\right)^{n_{14}}\right) \cdot \left(1 + \left(\frac{[mRNA_2]}{K_{12}^l}\right)^{n_{12}}\right)}$ | $V_1^s = 5; A_{14} = 4;$<br>$K_{14}^a = 1.6; n_{14} = 2;$<br>$K_{12}^l = 0.5; n_{12} = 1$ |
| $V_2^{\text{synth}} = \frac{V_2^s \cdot \left(1 + A_{24} \cdot \left(\frac{[mRNA_4]}{K_{24}^a}\right)^{n_{24}}\right)}{1 + \left(\frac{[mRNA_4]}{K_{24}^a}\right)^{n_{24}}}$                                                                                     | $V_2^s = 3.5; A_{24} = 4;$<br>$K_{24}^a = 1.6; n_{24} = 2$                                |
| $V_3^{\text{synth}} = \frac{V_3^s \cdot \left(1 + A_{32} \cdot \left(\frac{[mRNA_2]}{K_{32}^a}\right)^{n_{32}}\right)}{\left(1 + \left(\frac{[mRNA_2]}{K_{32}^a}\right)^{n_{32}}\right) \cdot \left(1 + \left(\frac{[mRNA_1]}{K_{31}^l}\right)^{n_{31}}\right)}$ | $V_3^s = 3; A_{32} = 5;$<br>$K_{32}^a = 1.5; n_{32} = 2;$<br>$K_{31}^l = 0.7; n_{31} = 1$ |
| $V_4^{\text{synth}} = \frac{V_4^s \cdot \left(1 + A_{43} \cdot \left(\frac{[mRNA_3]}{K_{43}^a}\right)^{n_{43}}\right)}{1 + \left(\frac{[mRNA_3]}{K_{43}^a}\right)^{n_{43}}}$                                                                                     | $V_4^s = 4; A_{43} = 2;$<br>$K_{43}^a = 0.15; n_{43} = 2$                                 |
| $V_1^{\text{degr}} = V_1^d \cdot [mRNA_1] / \left(K_1^d + [mRNA_1]\right)$                                                                                                                                                                                       | $V_1^d = 200; K_1^d = 30$                                                                 |
| $V_2^{\text{degr}} = V_2^d \cdot [mRNA_2] / \left(K_2^d + [mRNA_2]\right)$                                                                                                                                                                                       | $V_2^d = 500; K_2^d = 60$                                                                 |
| $V_3^{\text{degr}} = V_3^d \cdot [mRNA_3] / \left(K_3^d + [mRNA_3]\right)$                                                                                                                                                                                       | $V_3^d = 150; K_3^d = 10$                                                                 |
| $V_4^{\text{degr}} = V_4^d \cdot [mRNA_4] / \left(K_4^d + [mRNA_4]\right)$                                                                                                                                                                                       | $V_4^d = 500; K_4^d = 50$                                                                 |

Concentrations ( $[mRNA_i]$ ,  $i = 1 - 4$ ) and Michaelis constants ( $K_i^a$ ,  $K_i^l$ ,  $K_i^d$ ) are given in nM. Maximal enzyme rates ( $V_i^s$ ,  $V_i^d$ ) are expressed in  $\text{nM} \cdot \text{s}^{-1}$ . Kinetic equations comprising the model are:  $d[mRNA_i]/dt = V_i^{\text{synth}} - V_i^{\text{degr}}$ .
