# Supplementary material
Source: PubMed Central journal article supplement (PMC130547)
Supplement: pnas_192442699_4.pdf [file pnas_192442699_4.pdf]

**Table 1. Rate equations and parameter values of the MAPK cascade model**

| Rate equation                                                                                                                                                                     | Parameter values                                                                                    |
|-----------------------------------------------------------------------------------------------------------------------------------------------------------------------------------|-----------------------------------------------------------------------------------------------------|
| $v_1 = \frac{k_1^{cat} \cdot [RasGTP] \cdot [MKKK]}{(K_{11} + [MKKK] + [MKKKP] \cdot K_{11}/K_{12}) \cdot (1 + [MAPKPP]/K_i)}$                                                    | $k_1^{cat} = 1$ ;<br>[RasGTP] = 20;<br>$K_{11} = 300$ ; $K_{12} = 20$ ;<br>$K_i = 100$              |
| $v_2 = \frac{k_2^{cat} \cdot [RasGTP] \cdot [MKKKP]}{(K_{11} + [MKKK] + [MKKKP] \cdot K_{11}/K_{12}) \cdot (1 + [MAPKPP]/K_i)}$                                                   | $k_2^{cat} = 15$ ;<br>[MKKK] <sub>total</sub> = 200                                                 |
| $v_3 = \frac{V_3^{max} \cdot [MKKKP]}{(K_{31} + [MKKKP] + [MKKKP] \cdot K_{31}/K_{32} + [MKKK] \cdot K_{31}/K_{33})}$                                                             | $V_3^{max} = 18.8$ ; $K_{31} = 22$ ;<br>$K_{32} = 18$ ; $K_{33} = 80$                               |
| $v_4 = \frac{V_4^{max} \cdot [MKKKP]}{(K_{31} + [MKKKP] + [MKKKP] \cdot K_{31}/K_{32} + [MKKK] \cdot K_{31}/K_{33})}$                                                             | $V_4^{max} = 16.4$                                                                                  |
| $v_5 = \frac{k_5^{cat} \cdot [MKK] \cdot [MKKKP]}{(K_{51} + [MKK] + [MKKP] \cdot K_{51}/K_{52})}$                                                                                 | $k_5^{cat} = 1$ ; $K_{51} = 300$ ;<br>$K_{52} = 20$                                                 |
| $v_6 = \frac{k_6^{cat} \cdot [MKKP] \cdot [MKKKP]}{(K_{51} + [MKK] + [MKKP] \cdot K_{51}/K_{52})}$                                                                                | $k_6^{cat} = 15$ ;<br>[MKK] <sub>total</sub> = 180                                                  |
| $v_7 = \frac{V_7^{max} \cdot [MKKP] \cdot (1 + A \cdot [MAPKPP]/K_{mp})}{(K_{71} + [MKKP] + [MKKP] \cdot K_{71}/K_{72} + [MKK] \cdot K_{71}/K_{73}) \cdot (1 + [MAPKPP]/K_{mp})}$ | $V_7^{max} = 18.8$ ; $K_{71} = 22$ ;<br>$K_{72} = 18$ ; $K_{73} = 80$ ;<br>$A = 5$ ; $K_{mp} = 100$ |
| $v_8 = \frac{V_8^{max} \cdot [MKKP] \cdot (1 + A \cdot [MAPKPP]/K_{mp})}{(K_{71} + [MKKP] + [MKKP] \cdot K_{71}/K_{72} + [MKK] \cdot K_{71}/K_{73}) \cdot (1 + [MAPKPP]/K_{mp})}$ | $V_8^{max} = 16.4$                                                                                  |
| $v_9 = \frac{k_9^{cat} \cdot [MKKP] \cdot [MAPK]}{(K_{91} + [MAPK] + [MAPKP] \cdot K_{91}/K_{92})}$                                                                               | $k_9^{cat} = 1$ ; $K_{91} = 300$ ;<br>$K_{92} = 20$                                                 |
| $v_{10} = \frac{k_{10}^{cat} \cdot [MKKP] \cdot [MAPKP]}{(K_{91} + [MAPK] + [MAPKP] \cdot K_{91}/K_{92})}$                                                                        | $k_{10}^{cat} = 15$ ;<br>[MAPK] <sub>total</sub> = 360                                              |
| $v_{11} = \frac{V_{11}^{max} \cdot [MAPKPP]}{(K_{111} + [MAPKPP] + [MAPKP] \cdot K_{111}/K_{112} + [MAPK] \cdot K_{111}/K_{113})}$                                                | $V_{11}^{max} = 8.4$ ; $K_{111} = 22$ ;<br>$K_{112} = 18$ ; $K_{113} = 80$                          |
| $v_{12} = \frac{V_{12}^{max} \cdot [MAPKP]}{(K_{111} + [MAPKPP] + [MAPKP] \cdot K_{111}/K_{112} + [MAPK] \cdot K_{111}/K_{113})}$                                                 | $V_{12}^{max} = 7.3$                                                                                |

Concentrations and the Michaelis constants ( $K_{ij}$ ,  $i = 1, 3, 5, 7, 9, 11$ ;  $j = 1, 2, 3$ ;  $K_{mp}$ ;  $K_i$ ) are given in nM. The catalytic rate constants ( $k_i^{cat}$ ,  $i = 1, 2, 5, 6, 9, 10$ ) and maximal enzyme rates ( $V_i^{max}$ ,  $i = 3, 4, 7, 8, 11, 12$ ) are expressed in  $s^{-1}$  and  $nM \cdot s^{-1}$ , respectively. The kinetic equations and moiety conservations derived from the stoichiometry are the following:  $d[MKKK-P]/dt = v_1 - v_2 + v_3 - v_4$ ;  $d[MKKK-PP]/dt = v_2 - v_3$ ;  $d[MKK-P]/dt = v_5 - v_6 + v_7 - v_8$ ;  $d[MKK-PP]/dt = v_6 - v_7$ ;  $d[MAPK-P]/dt = v_9 - v_{10} + v_{11} - v_{12}$ ;  $d[MAPK-PP]/dt = v_{10} - v_{11}$ ;  $[MKKK]_{total} = [MKKK] + [MKKK-P] + [MKKK-PP]$ ;  $[MKK]_{total} = [MKK] + [MKK-P] + [MKK-PP]$ ;  $[MAPK]_{total} = [MAPK] + [MAPK-P] + [MAPK-PP]$ . MAPK, mitogen-activated protein kinase; MKK, MAPK kinase; MKKK, MKK kinase; P, monophosphorylated form; PP, bisphosphorylated form.
